# Supplementary material for: Mechanical Amorphization of Chitosan with Different Molecular Weights
Source: MDPI journal article supplement (doi:10.3390/polym14204438), 2022-10-20
Supplement: s1 [file s1]

# Mechanical Amorphization of Chitosan with Different Molecular Weights

Ekaterina Podgorbunskikh <sup>1,\*</sup>, Timofei Kuskov <sup>1,2</sup>, Denis Rychkov <sup>1,3</sup>, Oleg Lomovskii <sup>1</sup> and Aleksey Bychkov <sup>1,4,\*</sup>

<sup>1</sup> Laboratory of Mechanochemistry, Institute of Solid State Chemistry and Mechanochemistry SB RAS, 18 Kutateladze Str., 630090 Novosibirsk, Russia

<sup>2</sup> Department of Natural Sciences, Novosibirsk State University, 2 Pirogov Str., 630090 Novosibirsk, Russia

<sup>3</sup> Laboratory of Physicochemical Fundamentals of Pharmaceutical Materials, Novosibirsk State University, 2 Pirogov Str., 630090 Novosibirsk, Russia

<sup>4</sup> Faculty of Business, Novosibirsk State Technical University, 20 Karl Marx Ave., 630073, Novosibirsk, Russia

\* Correspondence: podgorbunskikh@solid.nsc.ru (E.P.); bychkov.a.l@gmail.com (A.B.)

**Table S1.** The coefficients of eighth-order Fourier model for fitting the XRD data of amorphous chitosans.

|    | High MW chitosan |                | Medium MW chitosan |                | Low MW chitosan |                | Coefficients obtained by averaging the XRD patterns of amorphous high, medium, and low MW chitosans (Table 2) |          |
|----|------------------|----------------|--------------------|----------------|-----------------|----------------|---------------------------------------------------------------------------------------------------------------|----------|
|    | Value            | Standard Error | Value              | Standard Error | Value           | Standard Error |                                                                                                               |          |
| a0 | 2104.627         | 1.92309        | 2043.183           | 1.8006         | 2026.002        | 1.94075        | 2057.084                                                                                                      | 1.84456  |
| a1 | -900.359         | 7.5597         | -863.168           | 7.71334        | -988.725        | 7.50582        | -914.435                                                                                                      | 7.46477  |
| a2 | -1265.86         | 5.65079        | -1181.57           | 5.07546        | -1061.3         | 5.9494         | -1172.64                                                                                                      | 5.41334  |
| a3 | 520.7729         | 2.70404        | 516.5861           | 2.998          | 589.9593        | 3.25257        | 543.3516                                                                                                      | 2.90869  |
| a4 | -343.512         | 1.60828        | -373.187           | 1.95155        | -379.746        | 2.03154        | -365.258                                                                                                      | 1.8274   |
| a5 | 143.6971         | 1.87071        | 105.512            | 1.94916        | 97.54484        | 2.37864        | 114.8187                                                                                                      | 2.01673  |
| a6 | 159.5398         | 1.84367        | 139.7876           | 2.0161         | 155.6665        | 1.94993        | 151.6756                                                                                                      | 1.90555  |
| a7 | -151.386         | 1.76535        | -135.79            | 2.03167        | -154.348        | 1.98581        | -146.855                                                                                                      | 1.89892  |
| a8 | -32.4264         | 4.77135        | -49.8505           | 4.56132        | -34.3203        | 5.28759        | -40.9378                                                                                                      | 4.77242  |
| b1 | 2459.837         | 1.70375        | 2350.022           | 1.85346        | 2136.736        | 2.2464         | 2316.039                                                                                                      | 1.87349  |
| b2 | -1044.94         | 7.61494        | -966.749           | 7.53414        | -1069.53        | 7.49423        | -1023.79                                                                                                      | 7.4345   |
| b3 | -22.8011         | 4.77059        | 20.21194           | 4.63262        | 65.27874        | 5.28926        | 18.31606                                                                                                      | 4.79972  |
| b4 | -27.8319         | 6.75228        | 23.23158           | 7.19097        | 53.40703        | 7.58847        | 19.11425                                                                                                      | 7.04378  |
| b5 | -140.946         | 1.81559        | -149.495           | 1.78987        | -163.475        | 1.83272        | -151.883                                                                                                      | 1.75917  |
| b6 | 58.50624         | 2.05676        | 30.1486            | 1.81232        | 56.49073        | 2.21486        | 47.14009                                                                                                      | 1.95135  |
| b7 | 100.1234         | 4.11561        | 108.5313           | 4.15564        | 100.7944        | 4.44548        | 104.8801                                                                                                      | 4.16536  |
| b8 | -137.131         | 1.87529        | -129.399           | 2.39191        | -144.336        | 2.09265        | -136.969                                                                                                      | 2.10719  |
| w  | 0.10961          | 1.40E-04       | 0.10881            | 1.41E-04       | 0.10956         | 1.50E-04       | 0.10926                                                                                                       | 1.41E-04 |

**Table S2.** The parameters of crystal structures obtained using different initial geometries and optimization options. Water position shows which water positions are occupied (123 means that all three positions are occupied, while 12 means that position 3 is vacant). Full\_Opt is for full unit cell optimization, Vol\_Fix is for volume (but not cell parameters) of the unit cell fixed, Cell\_Fix is for no cell optimization. Atom positions are free to optimize in all calculations. Italics are used for parameters that were fixed at a certain procedure.

| Water_positions | Form             | a    | b     | c     | alpha | beta  | gamma | V        |
|-----------------|------------------|------|-------|-------|-------|-------|-------|----------|
| 123             | <i>Input_Cif</i> | 8.95 | 16.97 | 10.34 | 90.00 | 90.00 | 90.00 | 1570.45  |
|                 | Full_Opt         | 7.12 | 13.82 | 10.37 | 90.00 | 90.01 | 90.00 | 1021.33* |
|                 | Vol_Fix          | 8.72 | 17.24 | 10.45 | 90.00 | 90.00 | 90.00 | 1570.45  |
|                 | Cell_Fix         | 8.95 | 16.97 | 10.34 | 90.00 | 90.00 | 90.00 | 1570.45  |
| 12              | <i>Input_Cif</i> | 8.95 | 16.97 | 10.34 | 90.00 | 90.00 | 90.00 | 1570.45  |
|                 | Full_Opt         | 6.10 | 15.17 | 10.60 | 90.00 | 90.00 | 90.00 | 980.48*  |
|                 | Vol_Fix          | 7.87 | 19.04 | 10.48 | 90.00 | 90.00 | 90.00 | 1570.45  |
|                 | Cell_Fix         | 8.95 | 16.97 | 10.34 | 90.00 | 90.00 | 90.00 | 1570.45  |
| 13              | <i>Input_Cif</i> | 8.95 | 16.97 | 10.34 | 90.00 | 90.00 | 90.00 | 1570.45  |
|                 | Full_Opt         | 7.60 | 15.95 | 10.60 | 90.00 | 90.00 | 90.00 | 1284.78* |
|                 | Vol_Fix          | 8.99 | 16.55 | 10.56 | 90.00 | 90.00 | 90.00 | 1570.45  |
|                 | Cell_Fix         | 8.95 | 16.97 | 10.34 | 90.00 | 90.00 | 90.00 | 1570.45  |
| 23              | <i>Input_Cif</i> | 8.95 | 16.97 | 10.34 | 90.00 | 90.00 | 90.00 | 1570.45  |
|                 | Full_Opt         | 6.33 | 14.95 | 10.46 | 90.00 | 90.00 | 90.00 | 989.97*  |
|                 | Vol_Fix          | 9.58 | 15.61 | 10.50 | 90.00 | 90.00 | 90.00 | 1570.45  |
|                 | Cell_Fix         | 8.95 | 16.97 | 10.34 | 90.00 | 90.00 | 90.00 | 1570.45  |

\* Full DFT optimization leads to significant unit cell shrink in *a* direction and cannot be recommended for the chitosan system. Such significant deviation in unit cell parameters can be explained by substantial inaccuracies in the initial chitosan structure file. This is another argument for not using Rietveld refinement in this case.

Differential scanning calorimetry (DSC) analyses were carried out in argon gas atmosphere. Approximately 2 mg of native tapioca starch and starch-based films were weighed in hermetic pans in order to avoid water loss. An empty hermetic pan was used as a reference. Samples were heated from 25 to 400 °C at a heating rate of 10 °C/min in the argon atmosphere.

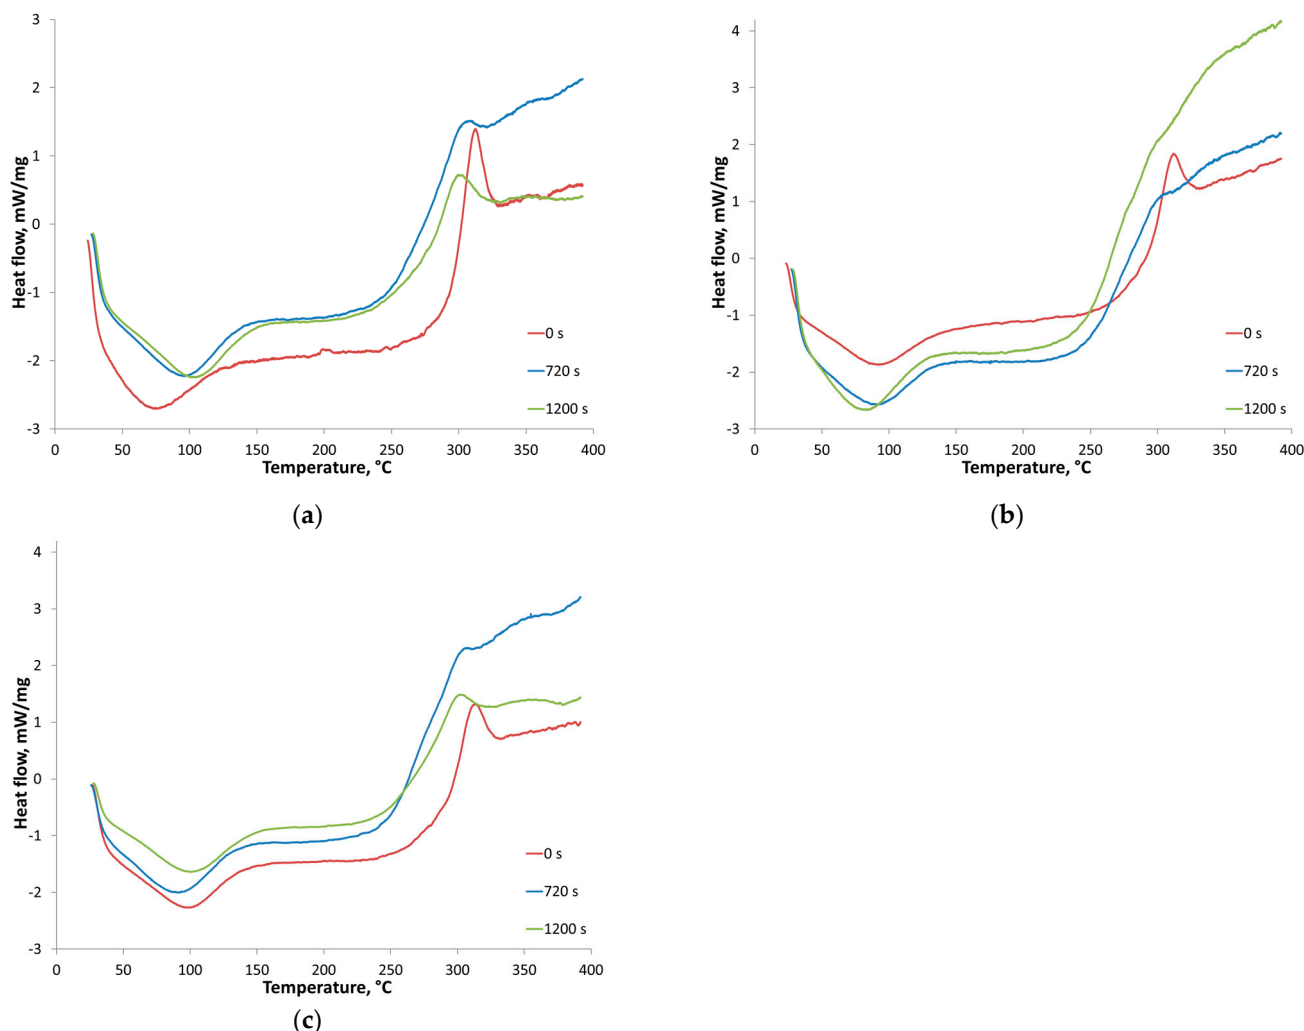

**Figure S1.** DSC curves of chitosan ((a) high MW, (b) medium MW, (c) low MW) subjected to mechanical treatment in a planetary ball mill for 0, 720, and 1200 s.

Differential scanning calorimetry (DSC) analyses were carried out in argon gas atmosphere. Approximately 2 mg of native tapioca starch and starch-based films were weighed in hermetic pans in order to avoid water loss. An empty hermetic pan was used as a reference. Samples were heated from 25 to 250 °C at a heating rate of 10 °C/min in the argon atmosphere.

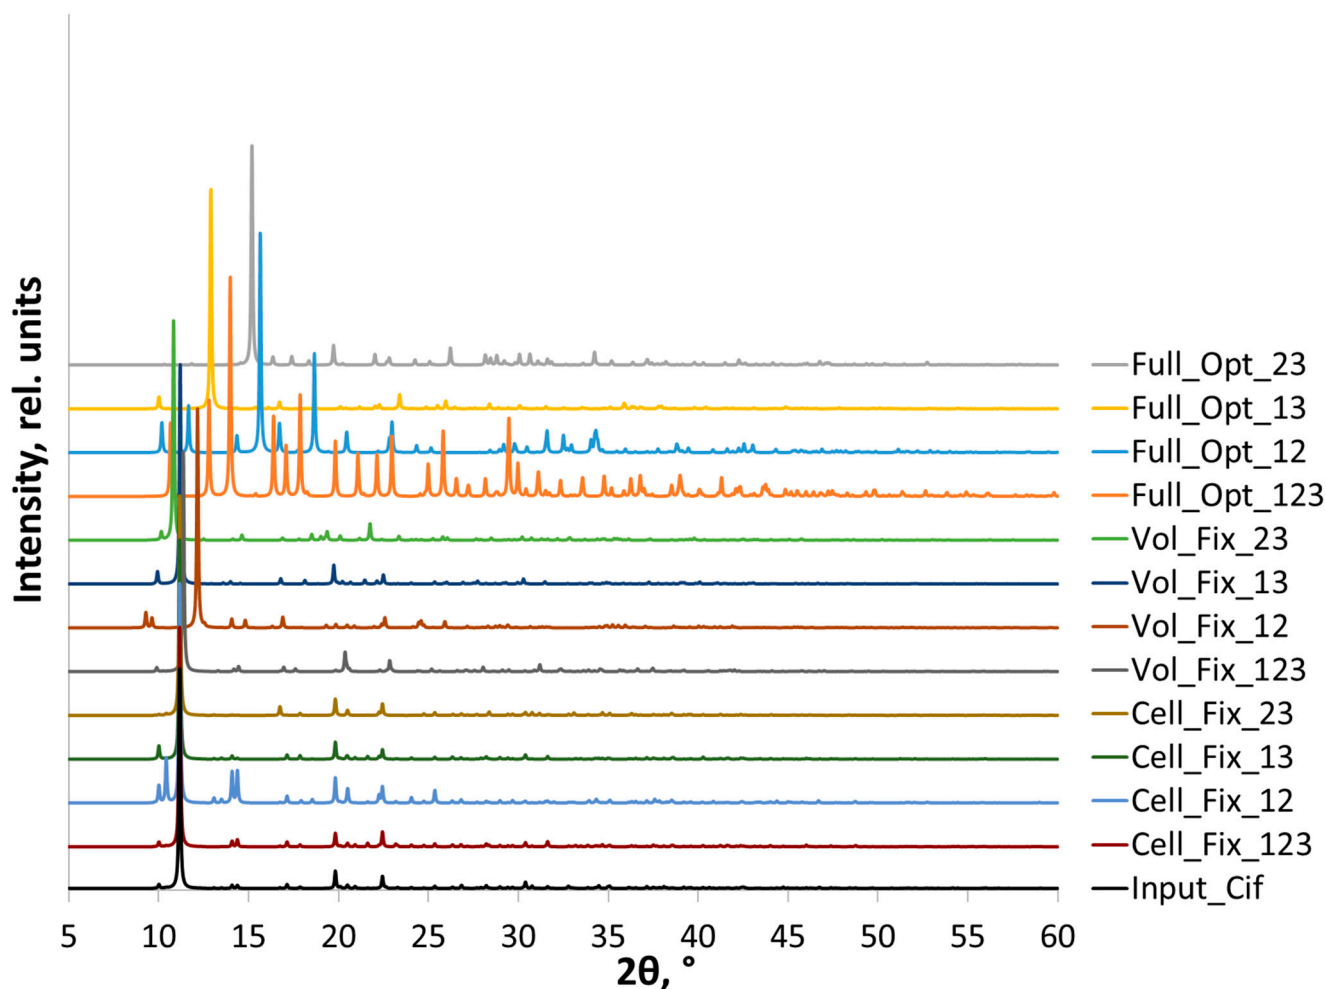

**Figure S2.** Predicted XRD patterns for crystal structures obtained using different initial geometries and optimization options. The initial structure was obtained from [\*] and used as input file for different DFT optimization procedures. Water position shows which water positions are occupied (123 means that all three positions are occupied, while 12 means that position 3 is vacant). Full\_Opt is for full unit cell optimization (ISIF=3), Vol\_Fix is for volume (but not cell parameters) of the unit cell fixed (ISIF=4), Cell\_Fix is for no cell optimization (ISIF=2). Atom positions were free to optimize in all calculations via the VASP 5.4.4 package.

\* Okuyama, K.; Noguchi, K.; Miyazawa, T.; Yui, T.; Ogawa, K. Molecular and crystal structure of hydrated chitosan. *Macromolecules* **1997**, *30*, 5849–5855. <https://doi.org/10.1021/ma970509n>

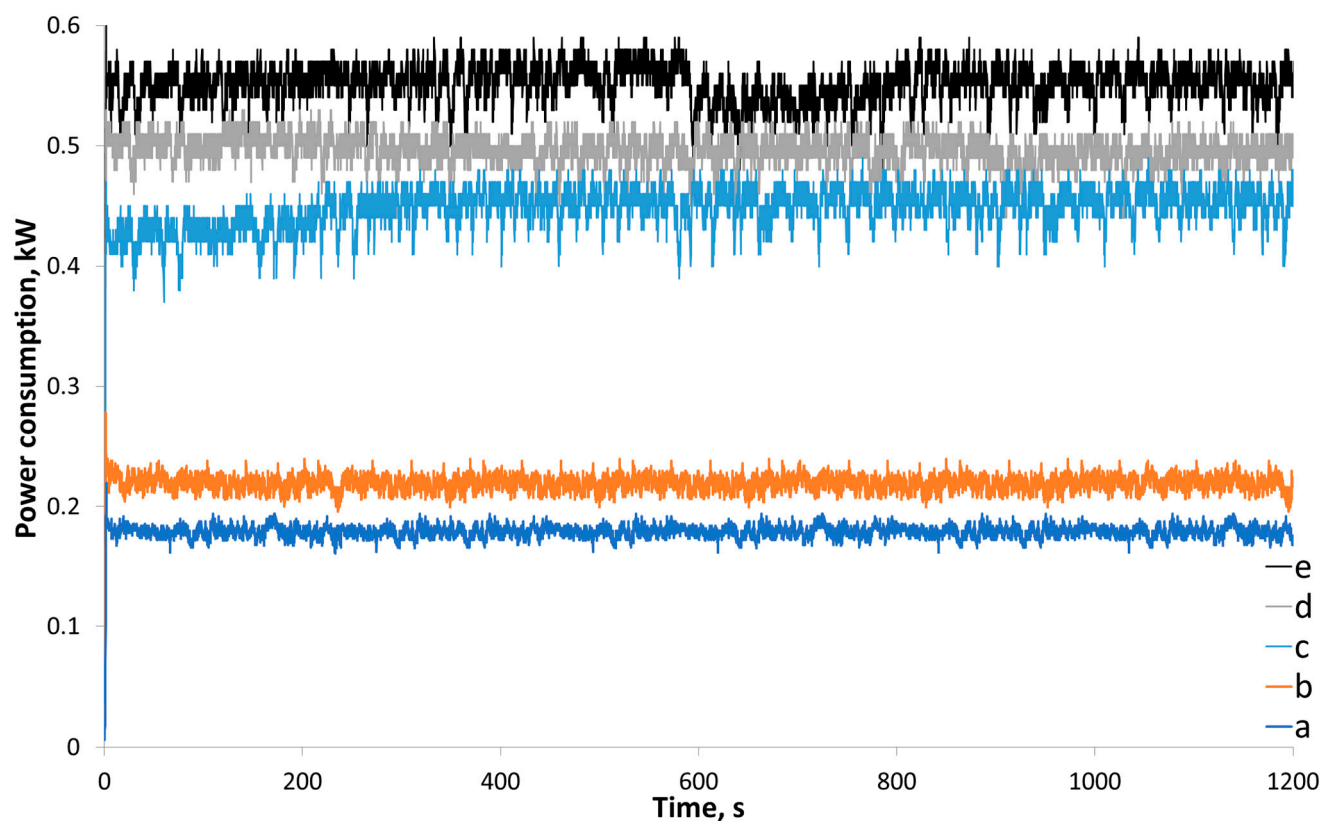

**Figure S3.** Current power consumption of the planetary ball mill: (a) the planetary gear without jars, (b) the planetary gear with empty jars; (c) jars containing grinding bodies and low MW chitosan; (d) jars containing grinding bodies and medium MW chitosan; (e) jars containing grinding bodies and high MW chitosan. Curves “d” and “e” are shifted upward by 0.05 and 0.1 kW, respectively, for clarity as indicated.
